# Supplementary material
Source: publisher site journal article supplement (https://www.dovepress.com/article/153887)
Supplement: Supplementary file 1 [file get_supplementary_file.php%3Ff%3D153887.pdf]

### Survey Instructions:

Please use a blue or black pen to complete this questionnaire.

To mark your answer, please fill in the bubbles completely, like this: ➔ ☐ No ☒ Yes

Most questions require you to choose one answer. Questions that allow multiple choices will be marked *[Mark all that apply.]*

**Screening** is defined in this survey as using tests to find health problems before patients have symptoms.

**Benefits** are any possible good effects that might come from screening for and treating a disease once it is found.

**Harms** are any possible bad effects that might come from screening for and treating a disease once it is found.

### Part A: Demographic Information

*The questions in the first section will help us to better understand you and your responses.*

Today's date is: 

|  |  |
|--|--|
|  |  |
|--|--|

 / 

|  |  |
|--|--|
|  |  |
|--|--|

 / 

|   |   |   |  |
|---|---|---|--|
| 2 | 0 | 1 |  |
|---|---|---|--|

  
*month* *day* *year*

1. What is your sex?

☐ male ☐ female

2. Do you consider yourself to be Hispanic or Latino?

☐ yes ☐ no

3. What do you consider to be your race? *[Choose one.]*

☐ American Indian or Alaskan Native

☐ Asian

☐ Black or African American

☐ Native Hawaiian or Other Pacific Islander

☐ White

☐ other ➔ *specify* \_\_\_\_\_

☐ refused

4. What is your age?

|              |  |
|--------------|--|
|              |  |
| <i>years</i> |  |

5. How long have you been in medical practice overall?

|  |  |
|--|--|
|  |  |
|--|--|

years

6. What is your degree?

- ☐ Doctor of Medicine (MD)
- ☐ Doctor of Osteopathic Medicine (DO)
- ☐ Nurse Practitioner (NP)
- ☐ Physician Assistant (PA)
- ☐ other → *specify* \_\_\_\_\_

7. What is your primary clinical role?

- ☐ clinician
- ☐ clinician-educator
- ☐ clinician-researcher
- ☐ other → *specify* \_\_\_\_\_

### ***Part B: Making Decisions About Screening***

1. How much influence does the U.S. Preventive Services Task Force (USPSTF) have on your screening recommendations?

- ☐ extremely influential
- ☐ very influential
- ☐ neither influential nor not influential
- ☐ not very influential
- ☐ not at all influential

2. Please say how much you agree or disagree with the following statement:

*I do not see much harm in ordering screening tests even if they are not recommended.*

- ☐ strongly agree
- ☐ somewhat agree
- ☐ neither agree nor disagree
- ☐ somewhat disagree
- ☐ strongly disagree

**Part C: Prostate Cancer Screening With PSA**

*These questions are about screening for prostate cancer using prostate specific antigen (PSA) testing.*

Patient #1: Mr. Morton is a white male with good cognitive status and no fatal disease. He has no family history of prostate cancer and no previous prostate findings or abnormal PSA tests. He had a normal PSA two years ago. His age is below.

*Please complete the tables below. Fill in one bubble for each block based on patient age and patient screening request [total of 6 answers per table].*

| 1. Do you <b>discuss</b> screening for prostate cancer using PSA for this patient? | <i>If Mr. Morton's age is . . .</i>                   |                                                       |                                                       |
|------------------------------------------------------------------------------------|-------------------------------------------------------|-------------------------------------------------------|-------------------------------------------------------|
|                                                                                    | <b>Age 90</b>                                         | <b>Age 70</b>                                         | <b>Age 50</b>                                         |
| a. if patient does <b>not</b> request screening                                    | <input type="radio"/> yes<br><input type="radio"/> no | <input type="radio"/> yes<br><input type="radio"/> no | <input type="radio"/> yes<br><input type="radio"/> no |
| b. if patient <b>does</b> request screening                                        | <input type="radio"/> yes<br><input type="radio"/> no | <input type="radio"/> yes<br><input type="radio"/> no | <input type="radio"/> yes<br><input type="radio"/> no |

| 2. Do you <b>recommend</b> screening for prostate cancer using PSA for this patient? | <i>If Mr. Morton's age is . . .</i>                   |                                                       |                                                       |
|--------------------------------------------------------------------------------------|-------------------------------------------------------|-------------------------------------------------------|-------------------------------------------------------|
|                                                                                      | <b>Age 90</b>                                         | <b>Age 70</b>                                         | <b>Age 50</b>                                         |
| a. if patient does <b>not</b> request screening                                      | <input type="radio"/> yes<br><input type="radio"/> no | <input type="radio"/> yes<br><input type="radio"/> no | <input type="radio"/> yes<br><input type="radio"/> no |
| b. if patient <b>does</b> request screening                                          | <input type="radio"/> yes<br><input type="radio"/> no | <input type="radio"/> yes<br><input type="radio"/> no | <input type="radio"/> yes<br><input type="radio"/> no |

3. Please indicate whether you agree or disagree with the following statements:

|                                                                                                                                         | <i>strongly disagree</i> | <i>somewhat disagree</i> | <i>neither agree nor disagree</i> | <i>somewhat agree</i> | <i>strongly agree</i> |
|-----------------------------------------------------------------------------------------------------------------------------------------|--------------------------|--------------------------|-----------------------------------|-----------------------|-----------------------|
| a. I would feel like I had done something wrong if I did not recommend that my patients have regular PSA screening for prostate cancer. |                          |                          |                                   |                       |                       |
| <b>Patient Age 70</b>                                                                                                                   | <input type="radio"/>    | <input type="radio"/>    | <input type="radio"/>             | <input type="radio"/> | <input type="radio"/> |
| <b>Patient Age 90</b>                                                                                                                   | <input type="radio"/>    | <input type="radio"/>    | <input type="radio"/>             | <input type="radio"/> | <input type="radio"/> |
| b. I don't feel any special responsibility to recommend PSA screening for prostate cancer.                                              |                          |                          |                                   |                       |                       |
| <b>Patient Age 70</b>                                                                                                                   | <input type="radio"/>    | <input type="radio"/>    | <input type="radio"/>             | <input type="radio"/> | <input type="radio"/> |
| <b>Patient Age 90</b>                                                                                                                   | <input type="radio"/>    | <input type="radio"/>    | <input type="radio"/>             | <input type="radio"/> | <input type="radio"/> |
| c. When it comes to recommending prostate cancer screening with PSA, it is better to be safe than sorry.                                |                          |                          |                                   |                       |                       |
| <b>Patient Age 70</b>                                                                                                                   | <input type="radio"/>    | <input type="radio"/>    | <input type="radio"/>             | <input type="radio"/> | <input type="radio"/> |
| <b>Patient Age 90</b>                                                                                                                   | <input type="radio"/>    | <input type="radio"/>    | <input type="radio"/>             | <input type="radio"/> | <input type="radio"/> |
| d. Screening for prostate cancer with PSA is just looking for trouble.                                                                  |                          |                          |                                   |                       |                       |
| <b>Patient Age 70</b>                                                                                                                   | <input type="radio"/>    | <input type="radio"/>    | <input type="radio"/>             | <input type="radio"/> | <input type="radio"/> |
| <b>Patient Age 90</b>                                                                                                                   | <input type="radio"/>    | <input type="radio"/>    | <input type="radio"/>             | <input type="radio"/> | <input type="radio"/> |
| e. I would regret not recommending prostate cancer screening with PSA to a patient later diagnosed with prostate cancer.                |                          |                          |                                   |                       |                       |
| <b>Patient Age 70</b>                                                                                                                   | <input type="radio"/>    | <input type="radio"/>    | <input type="radio"/>             | <input type="radio"/> | <input type="radio"/> |
| <b>Patient Age 90</b>                                                                                                                   | <input type="radio"/>    | <input type="radio"/>    | <input type="radio"/>             | <input type="radio"/> | <input type="radio"/> |

4. To what degree would the following factors influence your **recommendation** for prostate cancer screening for a 70 year old male patient?

|                                               | <i>no influence</i>   | <i>minimal influence</i> | <i>moderate influence</i> | <i>strong influence</i> |
|-----------------------------------------------|-----------------------|--------------------------|---------------------------|-------------------------|
| a. short time to spend with patient           | <input type="radio"/> | <input type="radio"/>    | <input type="radio"/>     | <input type="radio"/>   |
| b. worried I could be sued                    | <input type="radio"/> | <input type="radio"/>    | <input type="radio"/>     | <input type="radio"/>   |
| c. clinical reminders or performance measures | <input type="radio"/> | <input type="radio"/>    | <input type="radio"/>     | <input type="radio"/>   |

5. List as many **benefits** from prostate cancer screening as you can think of for Mr. Morton, a 70-year old patient. For each benefit, indicate how large you believe that benefit would be.

*[Please print one benefit per line Use as many lines as you need.]*

|          | <i>almost no<br/>benefit to<br/>patient</i> | <i>small<br/>benefit to<br/>patient</i> | <i>moderate<br/>benefit to<br/>patient</i> | <i>large<br/>benefit to<br/>patient</i> |
|----------|---------------------------------------------|-----------------------------------------|--------------------------------------------|-----------------------------------------|
| a. _____ | <input type="radio"/>                       | <input type="radio"/>                   | <input type="radio"/>                      | <input type="radio"/>                   |
| b. _____ | <input type="radio"/>                       | <input type="radio"/>                   | <input type="radio"/>                      | <input type="radio"/>                   |
| c. _____ | <input type="radio"/>                       | <input type="radio"/>                   | <input type="radio"/>                      | <input type="radio"/>                   |
| d. _____ | <input type="radio"/>                       | <input type="radio"/>                   | <input type="radio"/>                      | <input type="radio"/>                   |
| e. _____ | <input type="radio"/>                       | <input type="radio"/>                   | <input type="radio"/>                      | <input type="radio"/>                   |
| f. _____ | <input type="radio"/>                       | <input type="radio"/>                   | <input type="radio"/>                      | <input type="radio"/>                   |
| g. _____ | <input type="radio"/>                       | <input type="radio"/>                   | <input type="radio"/>                      | <input type="radio"/>                   |

6. List as many **harms** from prostate cancer screening as you can think of for Mr. Morton, a 70-year old patient. For each harm indicate how large you believe that harm would be.

*[Please print one harm per line. Use as many lines as you need.]*

|          | <i>almost no<br/>harm to<br/>patient</i> | <i>small<br/>harm to<br/>patient</i> | <i>moderate<br/>harm to<br/>patient</i> | <i>large<br/>harm to<br/>patient</i> |
|----------|------------------------------------------|--------------------------------------|-----------------------------------------|--------------------------------------|
| a. _____ | <input type="radio"/>                    | <input type="radio"/>                | <input type="radio"/>                   | <input type="radio"/>                |
| b. _____ | <input type="radio"/>                    | <input type="radio"/>                | <input type="radio"/>                   | <input type="radio"/>                |
| c. _____ | <input type="radio"/>                    | <input type="radio"/>                | <input type="radio"/>                   | <input type="radio"/>                |
| d. _____ | <input type="radio"/>                    | <input type="radio"/>                | <input type="radio"/>                   | <input type="radio"/>                |
| e. _____ | <input type="radio"/>                    | <input type="radio"/>                | <input type="radio"/>                   | <input type="radio"/>                |
| f. _____ | <input type="radio"/>                    | <input type="radio"/>                | <input type="radio"/>                   | <input type="radio"/>                |
| g. _____ | <input type="radio"/>                    | <input type="radio"/>                | <input type="radio"/>                   | <input type="radio"/>                |

7. On average, how difficult was it for you to come up with these harms for prostate cancer screening?

- ☐ not at all difficult  
☐ somewhat difficult  
☐ moderately difficult  
☐ very difficult  
☐ extremely difficult

8. Think of 100 healthy patients, like Mr. Morton age 70, whom you screen and find an elevated PSA of 8.0. You continue to follow them for the next 10 years.

a. Having the PSA test will lead to at least moderate **physical** harm at some point over the next 10 years for how many of these men?

- |                       |                       |                       |                       |                       |                       |                       |                       |                       |                       |                       |
|-----------------------|-----------------------|-----------------------|-----------------------|-----------------------|-----------------------|-----------------------|-----------------------|-----------------------|-----------------------|-----------------------|
| <input type="radio"/> |
| 0                     | 1-10                  | 11-20                 | 21-30                 | 31-40                 | 41-50                 | 51-60                 | 61-70                 | 71-80                 | 81-90                 | 91-100                |

b. Having the PSA test will lead to at least moderate **psychological** harm at some point over the next 10 years for how many of these men?

- |                       |                       |                       |                       |                       |                       |                       |                       |                       |                       |                       |
|-----------------------|-----------------------|-----------------------|-----------------------|-----------------------|-----------------------|-----------------------|-----------------------|-----------------------|-----------------------|-----------------------|
| <input type="radio"/> |
| 0                     | 1-10                  | 11-20                 | 21-30                 | 31-40                 | 41-50                 | 51-60                 | 61-70                 | 71-80                 | 81-90                 | 91-100                |

c. At the end of 10 years, how many of these men do you think will have had their lives lengthened by having had the PSA test?

- |                       |                       |                       |                       |                       |                       |                       |                       |                       |                       |                       |
|-----------------------|-----------------------|-----------------------|-----------------------|-----------------------|-----------------------|-----------------------|-----------------------|-----------------------|-----------------------|-----------------------|
| <input type="radio"/> |
| 0                     | 1-10                  | 11-20                 | 21-30                 | 31-40                 | 41-50                 | 51-60                 | 61-70                 | 71-80                 | 81-90                 | 91-100                |

[Continue to page 7] ➔

**Part D: Colon Cancer Screening**

*These questions are about screening for colon cancer using colonoscopy.*

Patient #2: Mr. Lewis is a white male with good cognitive status and no fatal disease. He has no family history of colon cancer and no risk factors or history of polyps. He had a normal colonoscopy ten years ago. His age is below.

*Please complete the tables below. Fill in one bubble for each block based on patient age and patient screening request [total of 6 answers per table].*

| 1. Do you <b>discuss</b> screening for colon cancer using colonoscopy for this patient? | <i>If Mr. Lewis' age is . . .</i>                     |                                                       |                                                       |
|-----------------------------------------------------------------------------------------|-------------------------------------------------------|-------------------------------------------------------|-------------------------------------------------------|
|                                                                                         | <b>Age 90</b>                                         | <b>Age 70</b>                                         | <b>Age 50</b>                                         |
| a. if patient does <b>not</b> request screening                                         | <input type="radio"/> yes<br><input type="radio"/> no | <input type="radio"/> yes<br><input type="radio"/> no | <input type="radio"/> yes<br><input type="radio"/> no |
| b. if patient <b>does</b> request screening                                             | <input type="radio"/> yes<br><input type="radio"/> no | <input type="radio"/> yes<br><input type="radio"/> no | <input type="radio"/> yes<br><input type="radio"/> no |

| 2. Do you <b>recommend</b> screening for colon cancer using colonoscopy for this patient? | <i>If Mr. Lewis' age is . . .</i>                     |                                                       |                                                       |
|-------------------------------------------------------------------------------------------|-------------------------------------------------------|-------------------------------------------------------|-------------------------------------------------------|
|                                                                                           | <b>Age 90</b>                                         | <b>Age 70</b>                                         | <b>Age 50</b>                                         |
| a. if patient does <b>not</b> request screening                                           | <input type="radio"/> yes<br><input type="radio"/> no | <input type="radio"/> yes<br><input type="radio"/> no | <input type="radio"/> yes<br><input type="radio"/> no |
| b. if patient <b>does</b> request screening                                               | <input type="radio"/> yes<br><input type="radio"/> no | <input type="radio"/> yes<br><input type="radio"/> no | <input type="radio"/> yes<br><input type="radio"/> no |

3. Please indicate whether you agree or disagree with the following statements:

- a. I would feel like I had done something wrong if I did not recommend that my patients have colonoscopies for colon cancer.

*strongly disagree*   *somewhat disagree*   *neither agree nor disagree*   *somewhat agree*   *strongly agree*

**Patient Age 70**

☐☐☐☐☐

**Patient Age 90**

☐☐☐☐☐

- b. I don't feel any special responsibility to recommend colonoscopy for cancer.

*strongly disagree*   *somewhat disagree*   *neither agree nor disagree*   *somewhat agree*   *strongly agree*

**Patient Age 70**

☐☐☐☐☐

**Patient Age 90**

☐☐☐☐☐

- c. When it comes to recommending colon cancer screening with colonoscopy, it is better to be safe than sorry.

*strongly disagree*   *somewhat disagree*   *neither agree nor disagree*   *somewhat agree*   *strongly agree*

**Patient Age 70**

☐☐☐☐☐

**Patient Age 90**

☐☐☐☐☐

- d. Screening for colon cancer with colonoscopy is just looking for trouble.

*strongly disagree*   *somewhat disagree*   *neither agree nor disagree*   *somewhat agree*   *strongly agree*

**Patient Age 70**

☐☐☐☐☐

**Patient Age 90**

☐☐☐☐☐

- e. I would regret not recommending colon cancer screening with colonoscopy to a patient later diagnosed with colon cancer.

*strongly disagree*   *somewhat disagree*   *neither agree nor disagree*   *somewhat agree*   *strongly agree*

**Patient Age 70**

☐☐☐☐☐

**Patient Age 90**

☐☐☐☐☐

4. To what degree would the following factors influence your **recommendation** for colon cancer screening for a 70 year old male patient?

*no influence*   *minimal influence*   *moderate influence*   *strong influence*

- a. short time to spend with patient

☐☐☐☐

- b. worried I could be sued

☐☐☐☐

- c. clinical reminders or performance measures

☐☐☐☐



5. List as many **benefits** from colon cancer screening as you can think of for Mr. Lewis a 70-year old patient. For each benefit, indicate how large you believe that benefit would be.

*[Please print one benefit per line. Use as many lines as you need.]*

|          | <i>almost no<br/>benefit to<br/>patient</i> | <i>small<br/>benefit to<br/>patient</i> | <i>moderate<br/>benefit to<br/>patient</i> | <i>large<br/>benefit to<br/>patient</i> |
|----------|---------------------------------------------|-----------------------------------------|--------------------------------------------|-----------------------------------------|
| a. _____ | <input type="radio"/>                       | <input type="radio"/>                   | <input type="radio"/>                      | <input type="radio"/>                   |
| b. _____ | <input type="radio"/>                       | <input type="radio"/>                   | <input type="radio"/>                      | <input type="radio"/>                   |
| c. _____ | <input type="radio"/>                       | <input type="radio"/>                   | <input type="radio"/>                      | <input type="radio"/>                   |
| d. _____ | <input type="radio"/>                       | <input type="radio"/>                   | <input type="radio"/>                      | <input type="radio"/>                   |
| e. _____ | <input type="radio"/>                       | <input type="radio"/>                   | <input type="radio"/>                      | <input type="radio"/>                   |
| f. _____ | <input type="radio"/>                       | <input type="radio"/>                   | <input type="radio"/>                      | <input type="radio"/>                   |
| g. _____ | <input type="radio"/>                       | <input type="radio"/>                   | <input type="radio"/>                      | <input type="radio"/>                   |

6. List as many **harms** from colon cancer screening as you can think of for Mr. Lewis, a 70-year old patient. For each harm indicate how large you believe that harm would be.

*[Please print one harm per line. Use as many lines as you need.]*

|          | <i>almost no<br/>harm to<br/>patient</i> | <i>small<br/>harm to<br/>patient</i> | <i>moderate<br/>harm to<br/>patient</i> | <i>large<br/>harm to<br/>patient</i> |
|----------|------------------------------------------|--------------------------------------|-----------------------------------------|--------------------------------------|
| a. _____ | <input type="radio"/>                    | <input type="radio"/>                | <input type="radio"/>                   | <input type="radio"/>                |
| b. _____ | <input type="radio"/>                    | <input type="radio"/>                | <input type="radio"/>                   | <input type="radio"/>                |
| c. _____ | <input type="radio"/>                    | <input type="radio"/>                | <input type="radio"/>                   | <input type="radio"/>                |
| d. _____ | <input type="radio"/>                    | <input type="radio"/>                | <input type="radio"/>                   | <input type="radio"/>                |
| e. _____ | <input type="radio"/>                    | <input type="radio"/>                | <input type="radio"/>                   | <input type="radio"/>                |
| f. _____ | <input type="radio"/>                    | <input type="radio"/>                | <input type="radio"/>                   | <input type="radio"/>                |
| g. _____ | <input type="radio"/>                    | <input type="radio"/>                | <input type="radio"/>                   | <input type="radio"/>                |

7. On average, how difficult was it for you to come up with these harms for colon cancer screening?

- ☐ not at all difficult
- ☐ somewhat difficult
- ☐ moderately difficult
- ☐ very difficult
- ☐ extremely difficult

8. Think of 100 healthy patients, like Mr. Lewis age 70, whom you screen with colonoscopy and find a 1.0 cm adenomatous polyp that is removed. You continue to follow them for the next 10 years.

a. Having the colonoscopy will lead to at least moderate **physical** harm at some point over the next 10 years for how many of these men?

- |                       |                       |                       |                       |                       |                       |                       |                       |                       |                       |                       |
|-----------------------|-----------------------|-----------------------|-----------------------|-----------------------|-----------------------|-----------------------|-----------------------|-----------------------|-----------------------|-----------------------|
| <input type="radio"/> |
| 0                     | 1-10                  | 11-20                 | 21-30                 | 31-40                 | 41-50                 | 51-60                 | 61-70                 | 71-80                 | 81-90                 | 91-100                |

b. Having the colonoscopy will lead to at least moderate **psychological** harm at some point over the next 10 years for how many of these men?

- |                       |                       |                       |                       |                       |                       |                       |                       |                       |                       |                       |
|-----------------------|-----------------------|-----------------------|-----------------------|-----------------------|-----------------------|-----------------------|-----------------------|-----------------------|-----------------------|-----------------------|
| <input type="radio"/> |
| 0                     | 1-10                  | 11-20                 | 21-30                 | 31-40                 | 41-50                 | 51-60                 | 61-70                 | 71-80                 | 81-90                 | 91-100                |

c. At the end of 10 years, how many of these men do you think will have had their lives lengthened by having had the colonoscopy?

- |                       |                       |                       |                       |                       |                       |                       |                       |                       |                       |                       |
|-----------------------|-----------------------|-----------------------|-----------------------|-----------------------|-----------------------|-----------------------|-----------------------|-----------------------|-----------------------|-----------------------|
| <input type="radio"/> |
| 0                     | 1-10                  | 11-20                 | 21-30                 | 31-40                 | 41-50                 | 51-60                 | 61-70                 | 71-80                 | 81-90                 | 91-100                |

**Thank you very much.** Your input will aid us in understanding clinicians' cancer screening decisions and practices. Please place the completed survey in the enclosed envelope and return to:

Anne Sutkowi-Hemstreet, MPH  
UNC Sheps Center for Health Services Research  
725 Martin Luther King Jr. Blvd.  
CB# 7590  
Chapel Hill, NC 27599

If you have any questions about the survey, please contact us by  
phone 919.843.6883,  
fax 919.966.3811,  
or email [sutkowi@email.unc.edu](mailto:sutkowi@email.unc.edu)
